# Supplementary material for: Experiences of recovery and posthospital care needs of working-age adults after physical trauma: a qualitative focus group study
Source: HighWire-hosted journal article supplement (doi:10.1136/bmjopen-2021-053330), 2022-04-01
Supplement: bmjopen-2021-053330supp001_data_supplement.pdf [file bmjopen-2021-053330supp001_data_supplement.pdf]

## Appendix 1

### Web-form

What is your gender?

- Male
- Female
- Diverse

What is your age in years?

How long ago did you sustain your injury?

- Less than one year ago
- 1-2 years ago
- 2-3 years ago
- 4-5 years ago
- More than 5 years ago

Do you have paid work right now?

- Yes
- No

If yes, is this the same work as you did before the injury?

- Yes
- No

How many hours do you work per week according to your contract?

How many hours do you actually work per week?
