# Supplementary material for: Experiences of recovery and posthospital care needs of working-age adults after physical trauma: a qualitative focus group study
Source: HighWire-hosted journal article supplement (doi:10.1136/bmjopen-2021-053330), 2022-04-01
Supplement: bmjopen-2021-053330supp003_data_supplement.pdf [file bmjopen-2021-053330supp003_data_supplement.pdf]

## Appendix 3

## Demographics of participants for each focus group

| Focus group       | Participants | Gender | Age | Type of injury | Time since injury | Being employed (paid) | Same work as before injury | Contractual working hours per week | Actual working hours |
|-------------------|--------------|--------|-----|----------------|-------------------|-----------------------|----------------------------|------------------------------------|----------------------|
| 1<br>(11-30-2020) | 1            | Male   | 20  | Mono           | 1-2 years ago     | Yes                   | Yes                        | 9                                  | 25                   |
|                   | 2            | Male   | 25  | Mono           | <1 year ago       | Yes                   | Yes                        | 40                                 | 40                   |
|                   | 3            | Male   | 41  | Mono           | 4-5 years ago     | Yes                   | No                         | 25                                 | 20-25                |
|                   | 4            | Female | 20  | Mono           | <1 year ago       | Yes                   | Yes                        | 16                                 | 12-13                |
| 2<br>(10-12-2020) | 1            | Female | 66  | Mono           | 4-5 years ago     | No                    | -                          | -                                  | -                    |
|                   | 2            | Female | 45  | Mono           | 2-3 years ago     | Yes                   | Yes                        | 36                                 | 36                   |
|                   | 3            | Female | 64  | Mono           | <1 year ago       | Yes                   | Yes                        | 12                                 | 15                   |
|                   | 4            | Female | 57  | Mono           | 1-2 years ago     | Yes                   | Yes                        | 20                                 | 25                   |
|                   | 5            | Male   | 46  | Mono           | 2-3 years ago     | Yes                   | Yes                        | 24                                 | 24                   |
| 3<br>(15-12-2020) | 1            | Female | 55  | Mono           | <1 year ago       | Yes                   | Yes                        | 32                                 | 32                   |
|                   | 2            | Male   | 57  | Mono           | 2-3 years ago     | Yes                   | Yes                        | 40                                 | 45                   |
|                   | 3            | Female | 44  | Mono           | 1-2 years ago     | Yes                   | Yes                        | 28                                 | 28                   |
|                   | 4            | Male   | 45  | Mono           | <1 year ago       | Yes                   | Yes                        | 36                                 | 36                   |
|                   | 5            | Female | 58  | Mono           | <1 year ago       | Yes                   | Yes                        | 40                                 | 0                    |
|                   | 6            | Female | 61  | Mono           | <1 year ago       | Yes                   | Yes                        | 20                                 | 20                   |
|                   | 7            | Female | 28  | Mono           | 3-4 years ago     | Yes                   | No                         | 32                                 | 32                   |
| 4<br>(12-12-2020) | 1            | Female | 50  | Poly           | 4-5 years ago     | No                    | -                          | -                                  | -                    |
|                   | 2            | Female | 63  | Poly           | 4-5 years ago     | No                    | -                          | -                                  | -                    |
|                   | 3            | Male   | 56  | Poly           | 2-3 years ago     | Yes                   | Yes                        | 40                                 | 50                   |
|                   | 4            | Male   | 48  | Poly           | >5 years ago      | Yes                   | No                         | 40                                 | 43                   |
|                   | 5            | Male   | 27  | Poly           | 3-4 years ago     | Yes                   | No                         | 24                                 | 28                   |
|                   | 6            | Male   | 28  | Poly           | 3-4 years ago     | No                    | -                          | -                                  | -                    |
|                   | 7            | Male   | 64  | Poly           | 1-2 years ago     | No                    | -                          | -                                  | -                    |
| 5<br>(12-1-2021)  | 1            | Male   | 39  | Poly           | 2-3 years ago     | Yes                   | No                         | 39                                 | 43                   |
|                   | 2            | Male   | 67  | Poly           | 4-5 years ago     | No                    | -                          | -                                  | -                    |
|                   | 3            | Female | 31  | Poly           | 1-2 years ago     | Yes                   | No                         | 38                                 | 38                   |
|                   | 4            | Male   | 59  | Poly           | 2-3 years ago     | Yes                   | Yes                        | 36                                 | 36                   |
|                   | 5            | Male   | 53  | Poly           | 1-2 years ago     | Yes                   | Yes                        | 38                                 | 38                   |
| 6<br>(12-12-2020) | 1            | Female | 62  | TBI            | <1 year ago       | Yes                   | Yes                        | On call                            | Variable             |
|                   | 2            | Female | 67  | TBI            | <1 year ago       | No                    | -                          | -                                  | -                    |
|                   | 3            | Female | 55  | TBI            | 2-3 years ago     | Yes                   | Yes                        | 20                                 | 20                   |

---

|             |   |        |    |     |               |     |     |         |      |
|-------------|---|--------|----|-----|---------------|-----|-----|---------|------|
|             | 4 | Male   | 55 | TBI | 4-5 years ago | No  | -   | -       | -    |
|             | 5 | Male   | 61 | TBI | 4-5 years ago | No  | -   | -       | -    |
|             | 6 | Female | 23 | TBI | 3-4 years ago | No  | -   | -       | -    |
| 7           | 1 | Female | 29 | TBI | >5 years ago  | Yes | No  | 24-32   | 30   |
| (14-1-2021) | 2 | Male   | 22 | TBI | 1-2 years ago | Yes | Yes | On call | 7-10 |
|             | 3 | Male   | 49 | TBI | 3-4 years ago | No  | -   | -       | -    |
|             | 4 | Male   | 34 | TBI | 4-5 years ago | Yes | Yes | 40      | 40   |
